# Supplementary material
Source: publisher figshare collection journal article supplement (https://acs.figshare.com/ndownloader/files/15371405)
Supplement: Supplementary file 1 [file 15371405]

## Supporting Information

### **Spinel Cobalt Titanium Binary Oxide as an All-Non-Precious Water Oxidation Electrocatalyst in Acid**

**Sengeni Anantharaj,<sup>[a],[b]</sup> Kannimuthu Karthick,<sup>[a],[b]</sup> and Subrata Kundu<sup>\*[a],[b]</sup>**

<sup>[a]</sup>Academy of Scientific and Innovative Research (AcSIR), Ghaziabad-201002, Uttar Pradesh, India.

<sup>[b]</sup>Materials Electrochemistry Division (MED), CSIR-Central Electrochemical Research Institute (CECRI), Karaikudi-630006, Tamil Nadu, India.

\* To whom correspondence should be addressed, *E-mail:* [skundu@cecri.res.in](mailto:skundu@cecri.res.in); [kundu.subrata@gmail.com](mailto:kundu.subrata@gmail.com), Phone: (+ 91) 4565-241486 and (+ 91) 4565-241487.

## EXPERIMENTAL

### Reagents and Instruments

Cobalt (II) chloride, Titanium (III) Chloride in HCl, Iridium oxide and potassium hydroxide were procured from Sigma-Aldrich. Sulphuric acid was purchased from RANKEM industries. Hg/HgO reference electrode was purchased from CH Instruments Pvt. Ltd. Deionized water (18 M $\Omega$ ) was used for the entire synthesis and electrocatalysis processes. The synthesized spinel Co<sub>2</sub>TiO<sub>4</sub> was characterized with HR-TEM, (Tecnai<sup>TM</sup> G<sup>2</sup> TF20) working at an accelerating voltage of 200 kV. The XRD analysis was done with a scanning rate of 5° min<sup>-1</sup> in the 2 $\theta$  range 10-90° using a Bruker X-ray powder diffractometer (XRD) with Cu K $\alpha$  radiation ( $\lambda$  = 0.154 nm). X-ray photoelectron spectroscopic (XPS) analysis was performed using a Theta Probe AR-XPS system (Thermo Fisher Scientific, UK). The spinel Co<sub>2</sub>TiO<sub>4</sub> modified carbon cloth (CC) was used as working electrode and a blank carbon cloth with large geometrical surface area (1.5  $\times$  3 cm) was used as a counter electrode. CH Instrument model number CHI6804c was used for entire electrochemical studies.

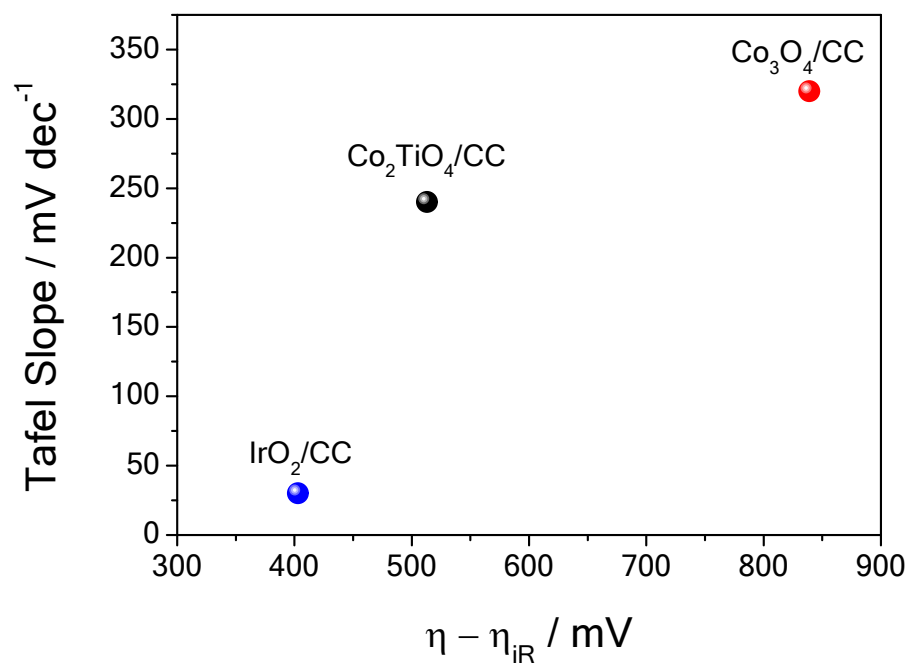

**Fig. S1:** Plot of overpotential vs. Tafel slope of  $\text{Co}_2\text{TiO}_4/\text{CC}$  interface in 0.5 M  $\text{H}_2\text{SO}_4$ .

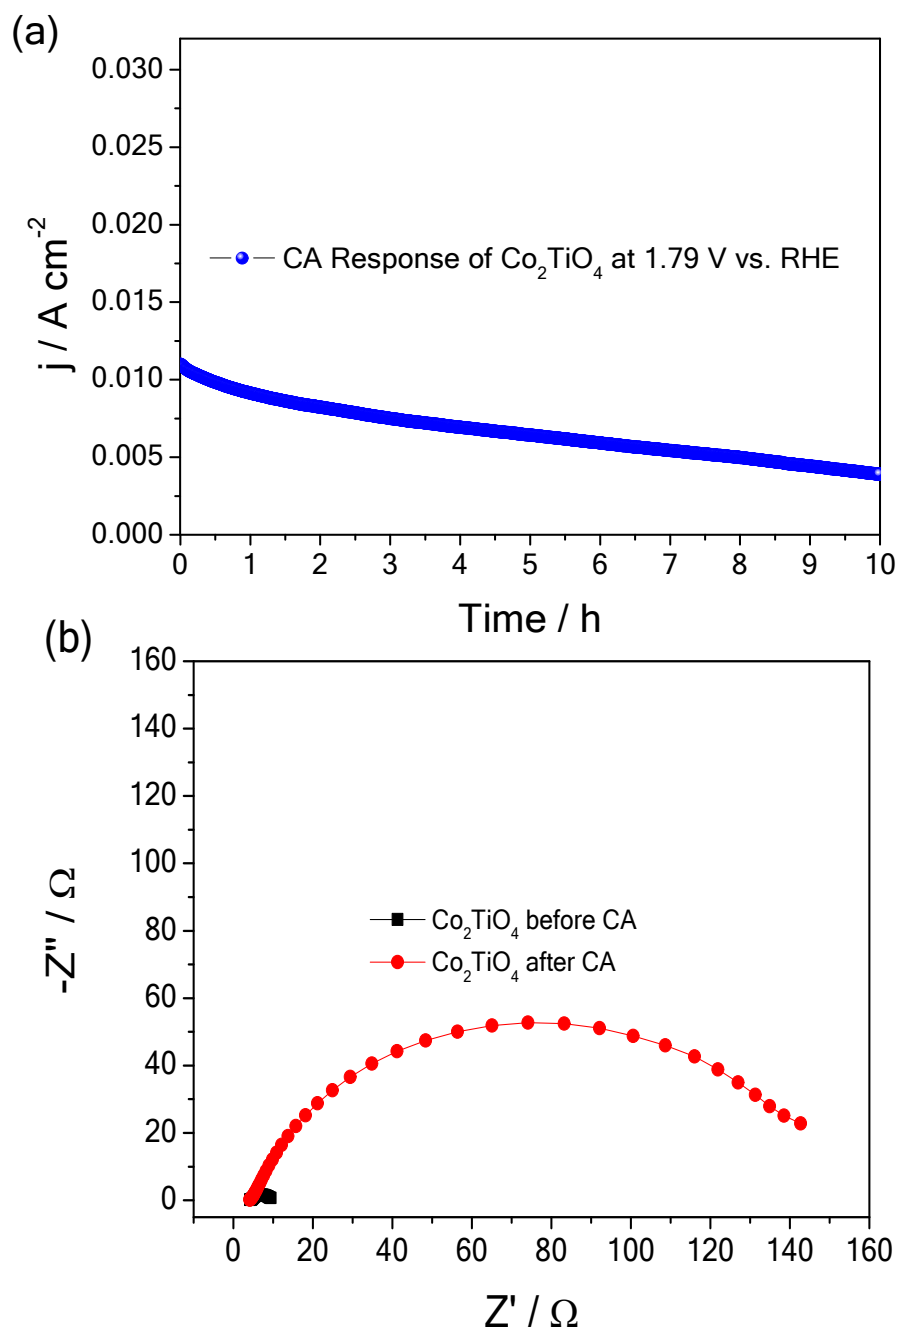

**Fig S2:** (a) Chronoamperometric response of  $\text{Co}_2\text{TiO}_4/\text{CC}$  at 1.79 V vs. RHE. (b) The Nyquist plots of the same before and after chronoamperometric analysis.

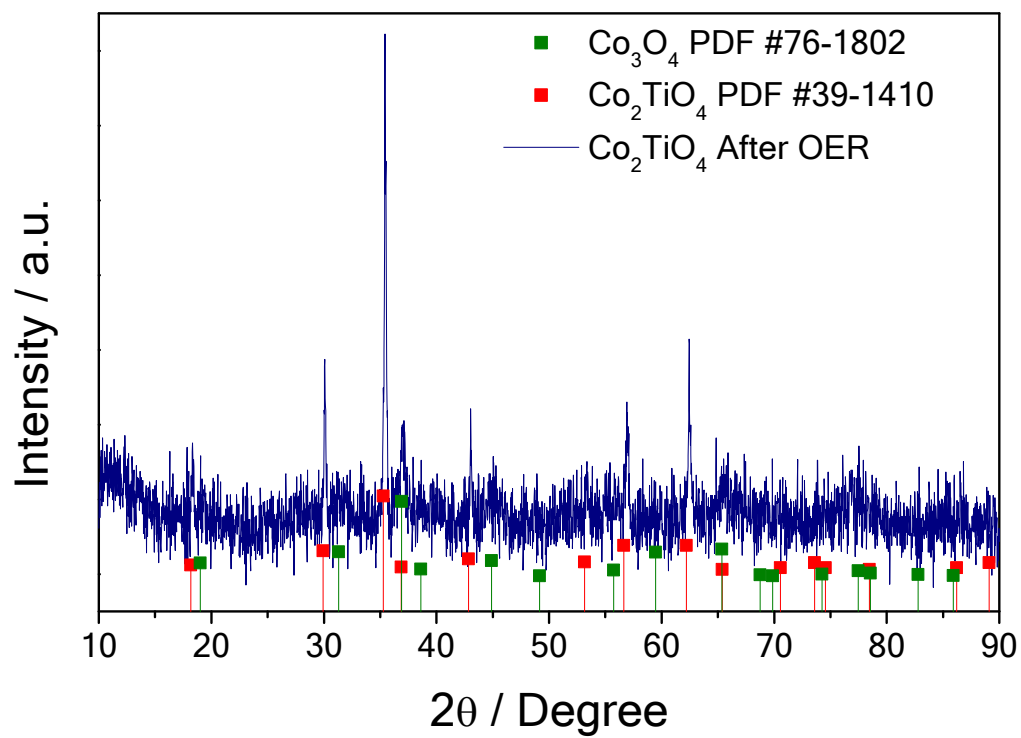

**Fig. S3:** XRD pattern of Co<sub>2</sub>TiO<sub>4</sub> after OER studies showing the presence of Co<sub>3</sub>O<sub>4</sub> along with Co<sub>2</sub>TiO<sub>4</sub>.

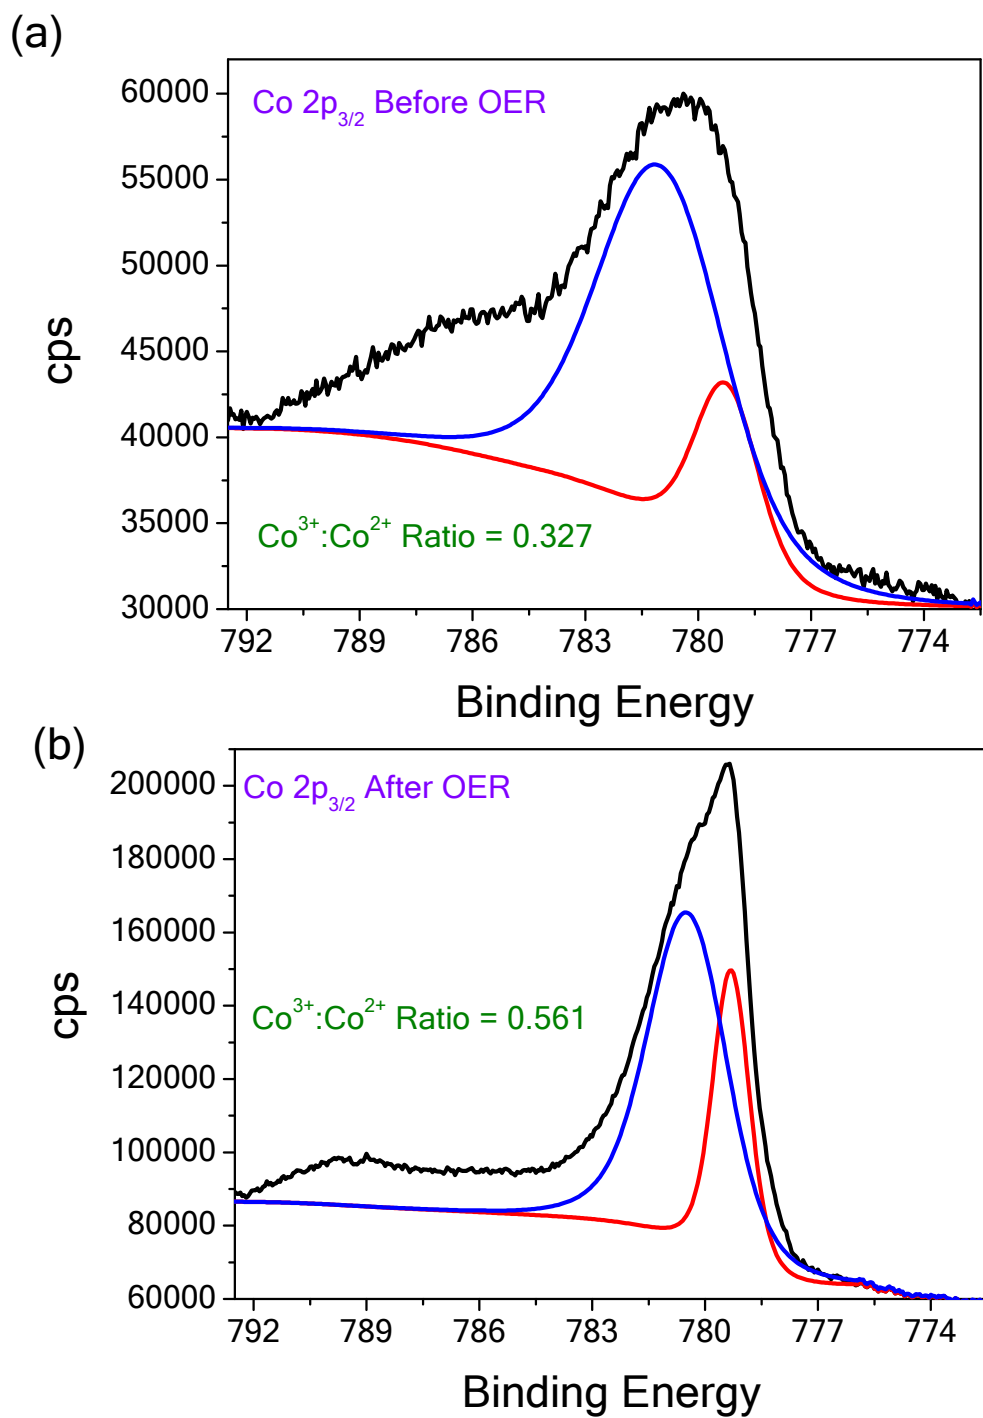

**Fig. S4:** (a-b) High resolution XPS spectra of Co 2p<sub>3/2</sub> state of Co<sub>2</sub>TiO<sub>4</sub> before and after OER studies.
